# Supplementary material for: Is pentavalent Pr(v) feasible in solid CsPrF6?
Source: Royal Society of Chemistry journal article supplement (doi:10.1039/d4dt02063d), 2024-01-01
Supplement: d4dt02063d2.pdf [file d4dt02063d2.pdf]

## *Supporting Information*

### **Is Pentavalent Pr(V) Feasible in Solid CsPrF<sub>6</sub>?**

Lian-Wei Ye<sup>a</sup>, Zi-He Zhang<sup>a</sup>, Yang He<sup>a</sup>, Shi-Ru Wei<sup>a</sup>, Jun-Bo Lu<sup>b</sup>, Han-Shi Hu<sup>a\*</sup> and Jun Li<sup>ab\*</sup>

<sup>a</sup>Department of Chemistry and Engineering Research Center of Advanced Rare-Earth Materials of Ministry of Education, Tsinghua University, Beijing 100084, China

<sup>b</sup>Fundamental Science Center of Rare Earths, Ganjiang Innovation Academy, Chinese Academy of Sciences, Ganzhou 341000, China

#### **Contents**

|                                                                                                                                                                                                                            |     |
|----------------------------------------------------------------------------------------------------------------------------------------------------------------------------------------------------------------------------|-----|
| I. CsPrF <sub>6</sub> Structure and Corresponding Properties                                                                                                                                                               |     |
| II. Structure and Corresponding Properties of Cs <sub>2</sub> PrF <sub>6</sub> , PrF <sub>3</sub> , CsF and F <sub>2</sub> .....                                                                                           | S2  |
| III. HSE06 band structure of CsPr <sup>II</sup> F <sub>3</sub> , Cs <sub>3</sub> Pr <sup>III</sup> F <sub>6</sub> , and Cs <sub>2</sub> Pr <sup>IV</sup> F <sub>6</sub> crystal.....                                       | S5  |
| IV. The pDOS analysis of CsPr <sup>II</sup> F <sub>3</sub> , Cs <sub>3</sub> Pr <sup>III</sup> F <sub>6</sub> , and Cs <sub>2</sub> Pr <sup>IV</sup> F <sub>6</sub> crystal.....                                           | S9  |
| V. The spin density analysis of CsPr <sup>II</sup> F <sub>3</sub> , Cs <sub>3</sub> Pr <sup>III</sup> F <sub>6</sub> , Cs <sub>2</sub> Pr <sup>IV</sup> F <sub>6</sub> , and CsPr <sup>V</sup> F <sub>6</sub> crystal..... | S15 |
| VI. The COHP analysis of CsPr <sup>II</sup> F <sub>3</sub> , Cs <sub>3</sub> Pr <sup>III</sup> F <sub>6</sub> , and Cs <sub>2</sub> Pr <sup>IV</sup> F <sub>6</sub> crystal. ....                                          | S17 |
| VII. CsPrF <sub>6</sub> Atom Coordinate Information.....                                                                                                                                                                   | S20 |

## I. CsPrF<sub>6</sub> Structure and Corresponding Properties

The crystal structure of CsPrF<sub>6</sub> is shown in Figure S1 and corresponding lattice parameters are listed in Table S1.

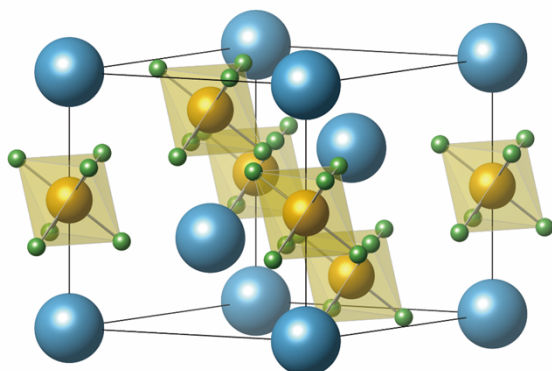

Figure S1. The structure of CsPrF<sub>6</sub> (Color scheme: Blue: Cs; Yellow: Pr; Green: F)

Table S1. The crystallographic parameters for prediction CsPrF<sub>6</sub> crystal structure

| CsPrF <sub>6</sub> Lattice Parameter |                   |
|--------------------------------------|-------------------|
| formula weight (g/ mol)              | 387.8             |
| crystal system                       | Rhombohedral      |
| space group                          | $R\bar{3}(\#148)$ |
| a = b (Å)                            | 7.799             |
| c (Å)                                | 8.079             |
| $\alpha = \beta$ (°)                 | 90                |
| $\gamma$ (°)                         | 120               |
| Z                                    | 3                 |
| volume (Å <sup>3</sup> )             | 421.31            |
| density, calc (g/ cm <sup>3</sup> )  | 4.585             |

The structure can be considered to consist four components as shown in Figure S2: (A)  $\text{Cs}^+$  on the vertices of the crystal unit cell, (B)  $\text{Cs}^+$  on the body diagonal, (C)  $[\text{PrF}_6]^-$  octahedra on the medium of the edge, and (D)  $[\text{PrF}_6]^-$  octahedra within the tetrahedral of  $\text{Cs}^+$

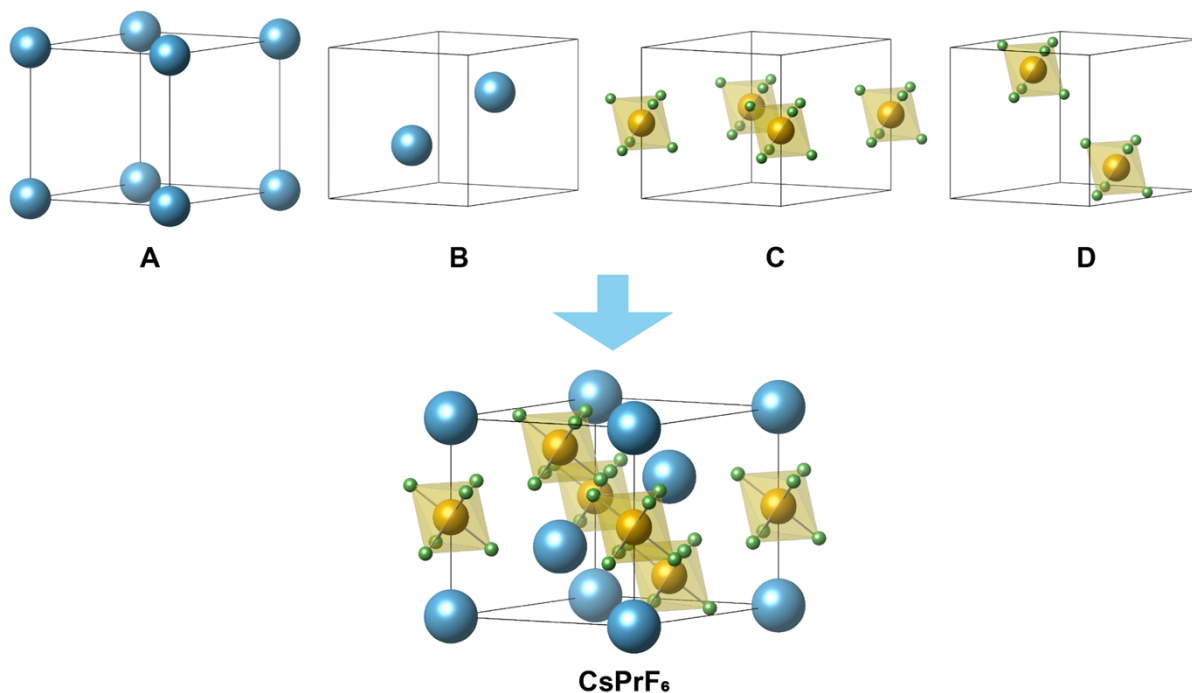

Figure S2. The components of  $\text{CsPrF}_6$ . (A)  $\text{Cs}^+$  on the vertices, (B)  $\text{Cs}^+$  on the body diagonal, (C)  $[\text{PrF}_6]^-$  octahedra on the medium of the edge, (D)  $[\text{PrF}_6]^-$  octahedra within the tetrahedral of  $\text{Cs}^+$  (Color scheme: Blue: Cs; Yellow: Pr; Green: F)

This optimal CsPrF<sub>6</sub> structure has been further confirmed to be stable by phonon spectrum calculations along the high-symmetry lines in the Brillouin zone. The spectrum was evaluated within the harmonic approximation by finite displacement method, and the spectra are constructed by using Phonopy program. A (3 × 3 × 3) supercell geometry was employed with a 1 × 1 × 1 k-point grid for the CsPrF<sub>6</sub> cell. The phonon spectrum is shown in Figure S3. Therefore, we can validate the kinetic stability of CsPrF<sub>6</sub>. And the thermodynamic free energies data with the entropy and zero-point energies corrected of F<sub>2</sub>, CsF, PrF<sub>3</sub> and CsPrF<sub>6</sub> at ambient temperature and pressure (300K, 1 atm) are listed in Table S2.

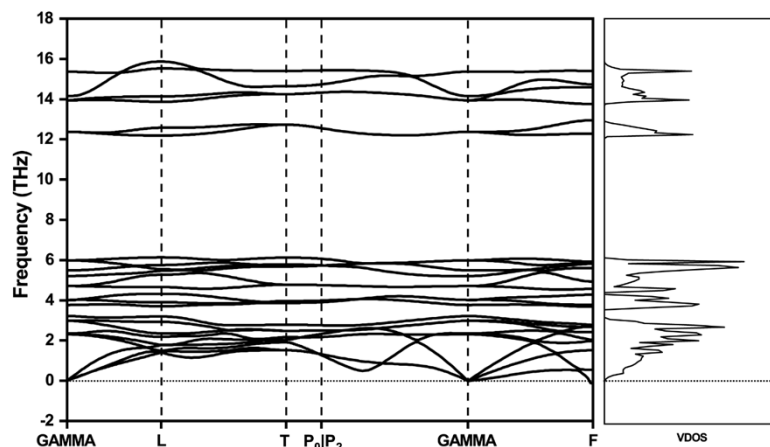

Figure S3. The calculated phonon spectrum of CsPrF<sub>6</sub> solid. The Gamma, L, T, P<sub>0</sub>, P<sub>2</sub>, F represent the k-points of (0, 0, 0), (0.5, 0, 0), (0.5, -0.5, 0.5), (0.403, -0.597, 0.403), (0.403, 0.403, 0.403) and (0.5, -0.5, 0) in the first Brillouin zone

Table S2. The Gibbs free energy with the entropy and zero-point energies (ZPE) corrected of F<sub>2</sub>, CsF, PrF<sub>3</sub>, Cs<sub>2</sub>PrF<sub>6</sub> and CsPrF<sub>6</sub> at ambient temperature and pressure (300K, 1 atm)

| Species                          | Pr-F Bond Length/ Å | E <sub>ele</sub> / eV | Correction/ eV | Gibbs Free Energy/ eV |
|----------------------------------|---------------------|-----------------------|----------------|-----------------------|
| F <sub>2</sub>                   |                     | - 3.709               | - 0.476        | - 4.186               |
| CsF                              |                     | - 8.033               | - 0.144        | - 8.178               |
| PrF <sub>3</sub>                 | 2.422               | - 28.236              | 0.036          | - 28.201              |
| Cs <sub>2</sub> PrF <sub>6</sub> | 2.141               | - 48.763              | 4.676          | - 44.086              |
| CsPrF <sub>6</sub>               | 2.077               | - 43.601              | - 0.177        | - 43.778              |

Plausible methods for synthesizing CsPrF<sub>6</sub> and its reaction energy are outlined in following reaction equation:

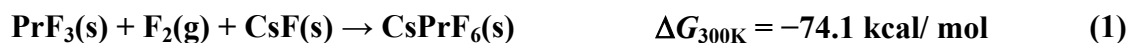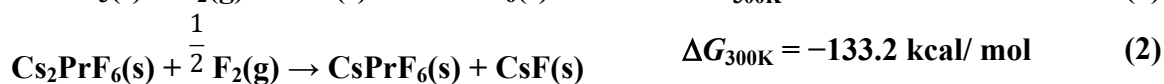

## II. Structure and Corresponding Properties of $\text{Cs}_2\text{PrF}_6$ , $\text{PrF}_3$ , $\text{CsF}$ and $\text{F}_2$

### $\text{Cs}_2\text{PrF}_6$

The structure of  $\text{Cs}_2\text{PrF}_6$  was obtained by OQMD with a space group ( $Fm\bar{3}m$ ). The bond length between Pr and F after optimization is 2.141 Å. The crystal structure of  $\text{Cs}_2\text{PrF}_6$  is shown in Figure S4 and corresponding lattice parameters are listed in Table S3. The phonon spectrum is shown in Figure S5. The phonon spectrum has no virtual frequency, which indicates the structure is stable.

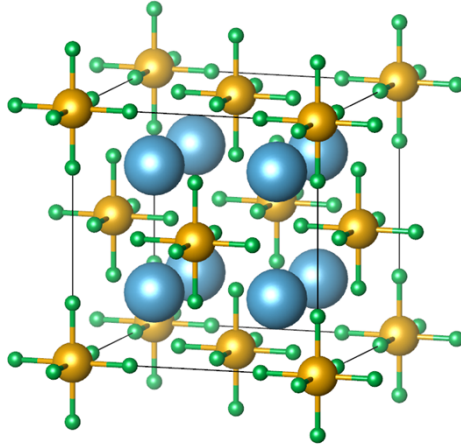

Figure S4. The structure of  $\text{Cs}_2\text{PrF}_6$  after optimization (Color scheme: Blue: Cs; Yellow: Pr; Green: F)

Table S3. The lattice parameter of  $\text{Cs}_2\text{PrF}_6$

| Species                   | Space Group          | Lattice Parameters |                 | Bond Length               |
|---------------------------|----------------------|--------------------|-----------------|---------------------------|
|                           |                      | $a/\text{Å}$       | $\alpha/^\circ$ | $r(\text{Pr-F})/\text{Å}$ |
| $\text{Cs}_2\text{PrF}_6$ | 225 ( $Fm\bar{3}m$ ) | 9.184              | 90              | 2.141                     |

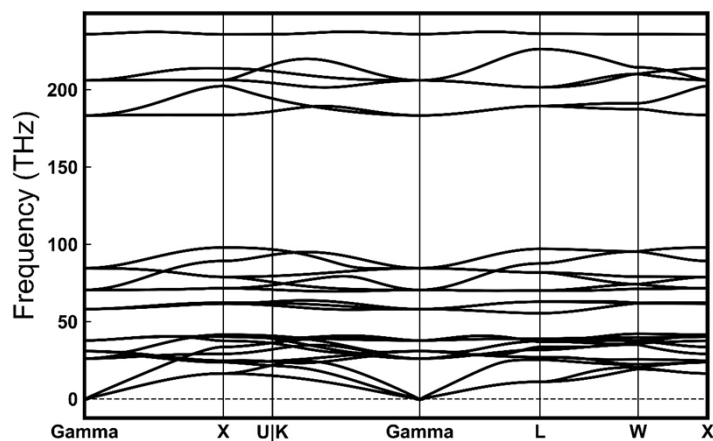

Figure S5. The calculated phonon spectrum of  $\text{Cs}_2\text{PrF}_6$  solid. The Gamma, X, U, K, L and W represent the k-points of (0, 0, 0), (0.5, 0, 0.5), (0.625, 0.25, 0.625), (0.375, 0.375, 0.75), (0.5, 0.5, 0.5) and (0.5, 0.25, 0.75) in the first Brillouin zone.

### PrF<sub>3</sub>

The structure of PrF<sub>3</sub> was obtained by ICSD with a space group (P3c1). The bond length between Pr and F after optimization is 2.410 Å. The crystal structure of PrF<sub>3</sub> is shown in Figure S6 and corresponding lattice parameters are listed in Table S4. The phonon spectrum is shown in Figure S7. The phonon spectrum has no virtual frequency, which indicates the structure is stable.

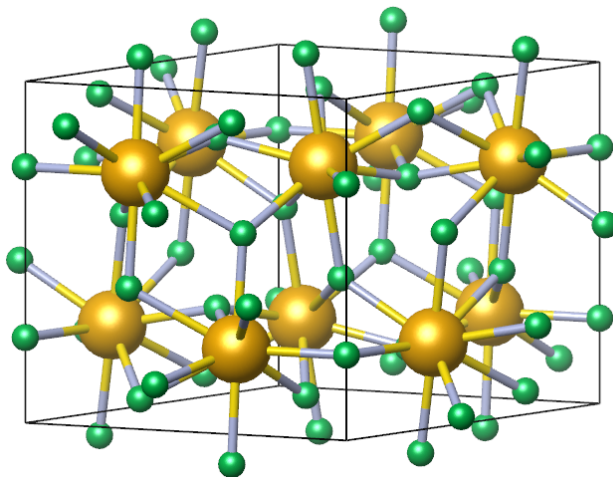

Figure S6. The structure of PrF<sub>3</sub> after optimization (Color scheme: Yellow: Pr; Green: F)

Table S4. The lattice parameter of PrF<sub>3</sub>

| Species          | Space Group | Lattice Parameters |       |                 |                 | Bond Length |
|------------------|-------------|--------------------|-------|-----------------|-----------------|-------------|
|                  |             | a/ Å               | c/ Å  | $\alpha/^\circ$ | $\gamma/^\circ$ | r(Pr-F)/ Å  |
| PrF <sub>3</sub> | 165 (P3c1)  | 7.069              | 7.225 | 90              | 120             | 2.410       |

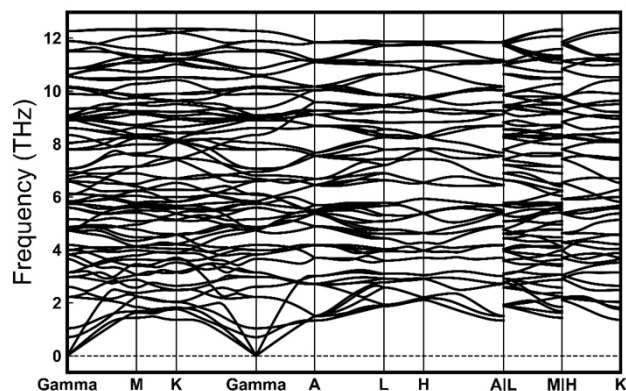

Figure S7. The calculated phonon spectrum of PrF<sub>3</sub> solid. The Gamma, M, K, A, L and H represent the k-points of (0, 0, 0), (0.5, 0, 0), (0.33, 0.33, 0), (0, 0, 0.5), (0.5, 0, 0.5) and (0.33, 0.33, 0.5) in the first Brillouin zone.

## CsF

The structure of CsF was obtained by ICSD with a space group ( $Fm\bar{3}m$ ). The crystal structure of CsF is shown in Figure S8 and corresponding lattice parameters are listed in Table S5. The phonon spectrum is shown in Figure S9. The phonon spectrum has no virtual frequency, which indicates the structure is stable.

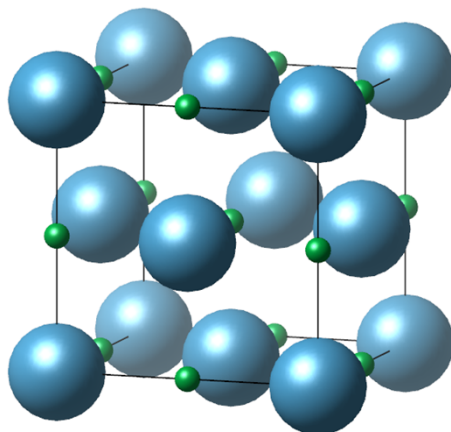

Figure S8. The structure of CsF after optimization (Color scheme: Blue: Cs; Green: F)

Table S5. The lattice parameter of CsF

| Species | Space Group          | Lattice Parameters |                 |
|---------|----------------------|--------------------|-----------------|
|         |                      | $a/\text{\AA}$     | $\alpha/^\circ$ |
| CsF     | 225 ( $Fm\bar{3}m$ ) | 6.118              | 90              |

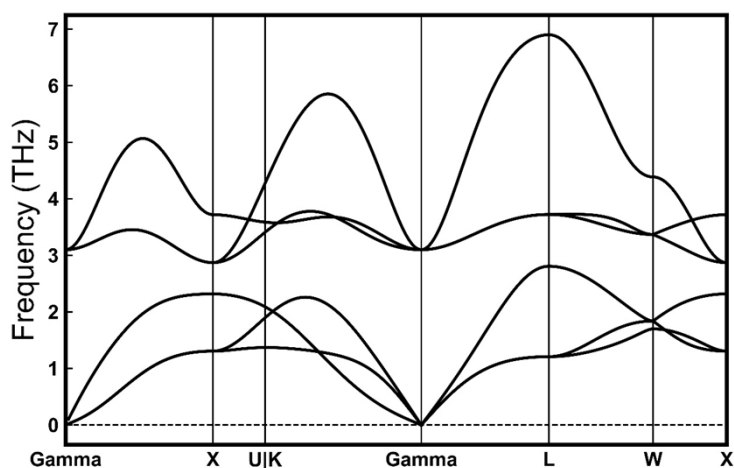

Figure S9. The calculated phonon spectrum of CsF solid. The Gamma, X, U, K, L and W represent the k-points of (0, 0, 0), (0.5, 0, 0.5), (0.625, 0.25, 0.625), (0.375, 0.375, 0.75), (0.5, 0.5, 0.5) and (0.5, 0.25, 0.75) in the first Brillouin zone.

**F<sub>2</sub>**

For the free energy calculation of F<sub>2</sub> molecules, a cell of 20Å × 20Å × 20Å was constructed to obtain F<sub>2</sub> electron energy (Figure S10), and then performed a vibration analysis on it.

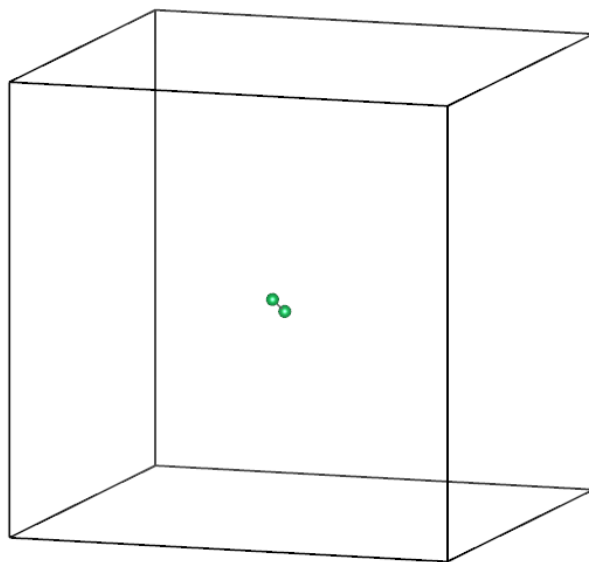

Figure S10. The ideal gas box of F<sub>2</sub> (Color scheme: Green: F)



### III. HSE06 band structure of $\text{CsPr}^{\text{II}}\text{F}_3$ , $\text{Cs}_3\text{Pr}^{\text{III}}\text{F}_6$ , and $\text{Cs}_2\text{Pr}^{\text{IV}}\text{F}_6$ crystal.

The band structure of  $\text{CsPr}^{\text{II}}\text{F}_3$ ,  $\text{Cs}_3\text{Pr}^{\text{III}}\text{F}_6$ , and  $\text{Cs}_2\text{Pr}^{\text{IV}}\text{F}_6$  crystal was shown in Figure S11 - S13.

#### $\text{CsPrF}_3$

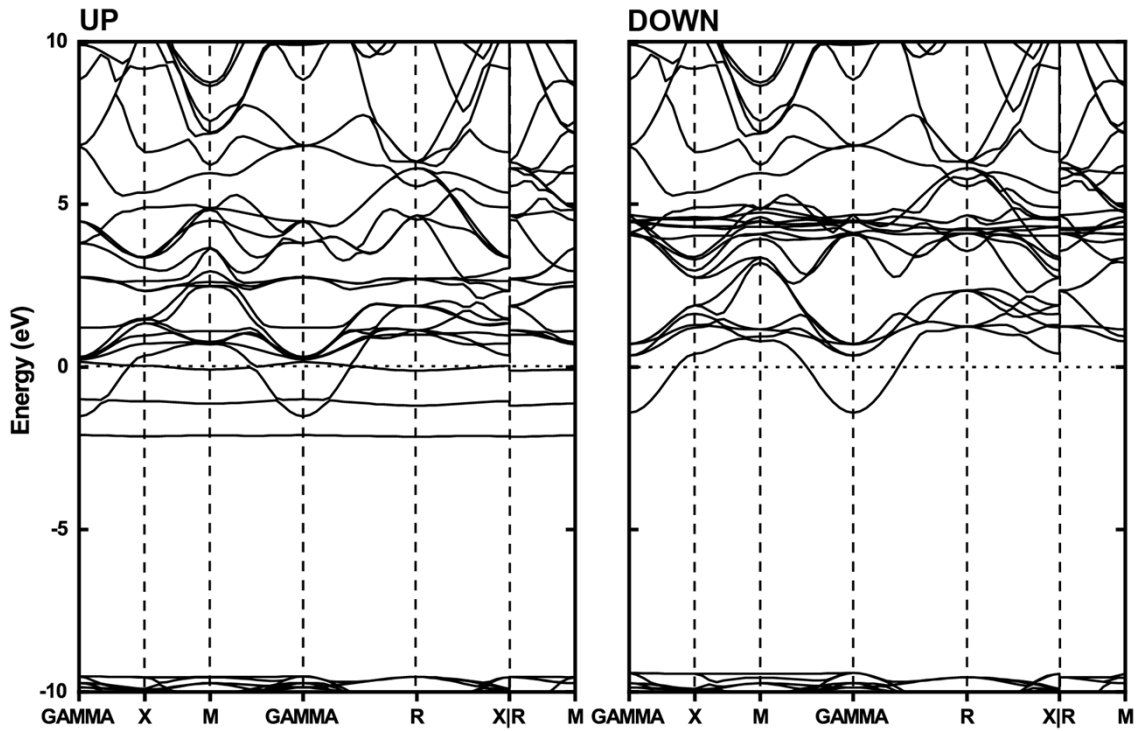

Figure S11. HSE06 band structure of  $\text{CsPr}^{\text{II}}\text{F}_3$ . The Fermi level is assigned at 0 eV. The four points of Gamma (0, 0, 0), X (0, 0.5, 0), M (0.5, 0.5, 0), and R (0.5, 0.5, 0.5) refer to high-symmetry points of the first Brillouin zone in reciprocal space.

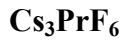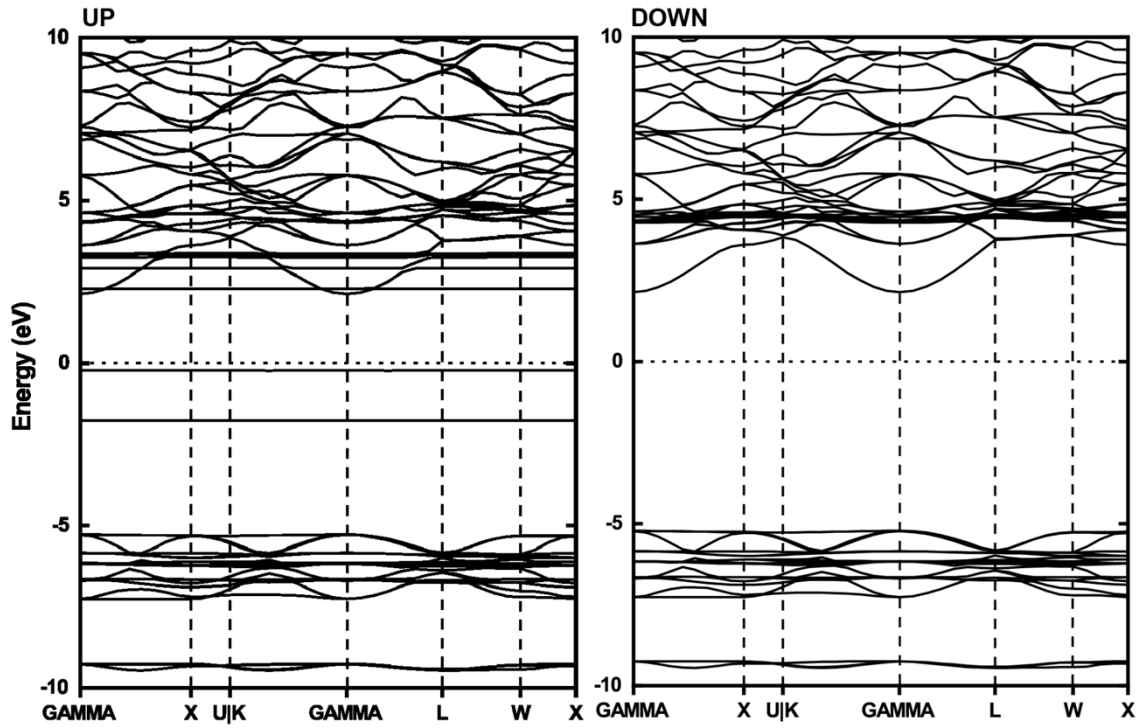

Figure S12. HSE06 band structure of  $\text{Cs}_3\text{Pr}^{\text{III}}\text{F}_6$ . The Fermi level is assigned at 0 eV. The six points of Gamma (0, 0, 0), X (0.5, 0, 0.5), U (0.625, 0.25, 0.625), K (0.375, 0.375, 0.75), L (0.5, 0.5, 0.5), and W (0.5, 0.25, 0.75) refer to high-symmetry points of the first Brillouin zone in reciprocal space.

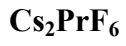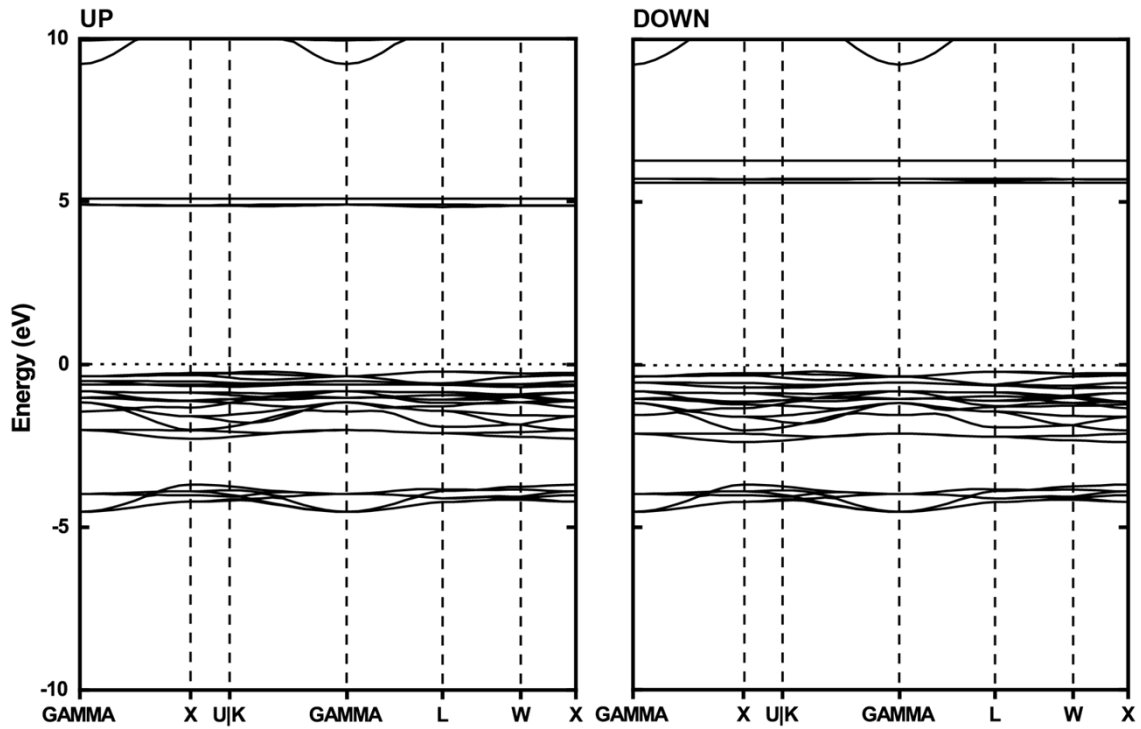

Figure S13. HSE06 band structure of  $\text{Cs}_2\text{Pr}^{\text{IV}}\text{F}_6$ . The Fermi level is assigned at 0 eV. The six points of Gamma (0, 0, 0), X (0.5, 0, 0.5), U (0.625, 0.25, 0.625), K (0.375, 0.375, 0.75), L (0.5, 0.5, 0.5), and W (0.5, 0.25, 0.75) refer to high-symmetry points of the first Brillouin zone in reciprocal space.

#### IV. The pDOS analysis of CsPr<sup>II</sup>F<sub>3</sub>, Cs<sub>3</sub>Pr<sup>III</sup>F<sub>6</sub>, and Cs<sub>2</sub>Pr<sup>IV</sup>F<sub>6</sub> crystal.

The pDOS data of CsPr<sup>II</sup>F<sub>3</sub>, Cs<sub>3</sub>Pr<sup>III</sup>F<sub>6</sub>, and Cs<sub>2</sub>Pr<sup>IV</sup>F<sub>6</sub> crystals are shown in Figure S14 - S16.  
CsPrF<sub>3</sub>

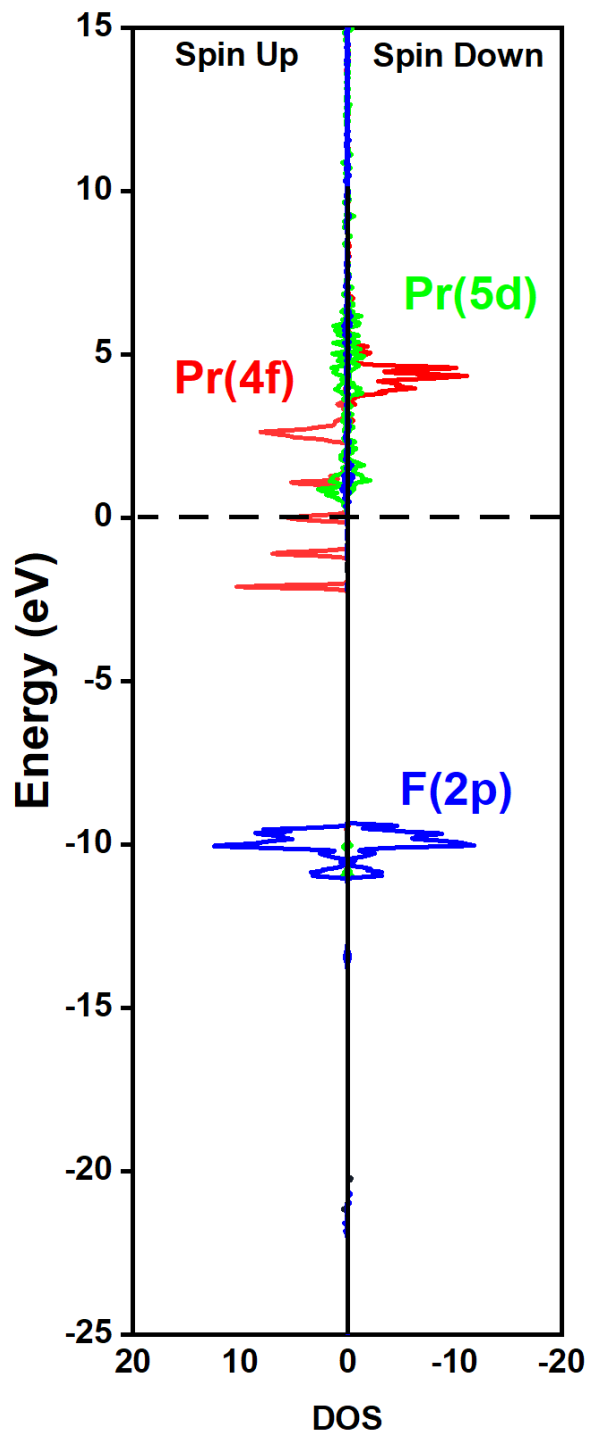

Figure S14. Partial density of states (PDOS) of CsPr<sup>II</sup>F<sub>3</sub> crystal. The Fermi level is assigned at 0 eV.

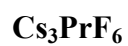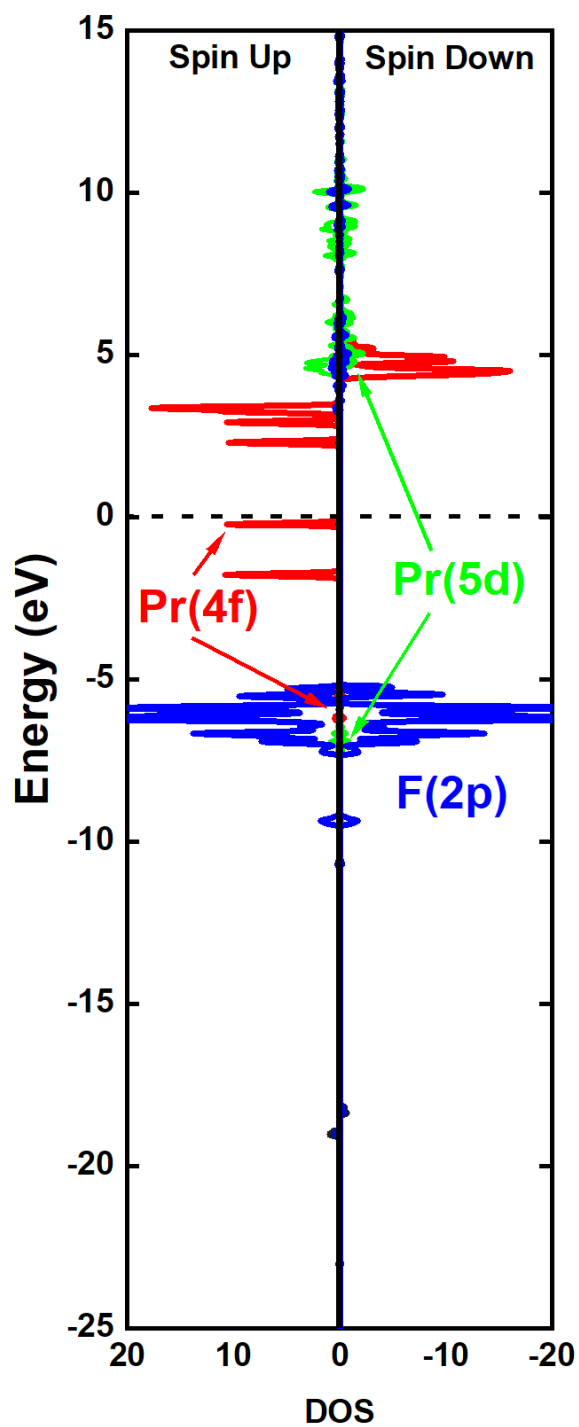

Figure S15. Partial density of states (PDOS) of  $\text{Cs}_3\text{Pr}^{\text{III}}\text{F}_6$  crystal. The Fermi level is assigned at 0 eV.

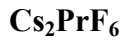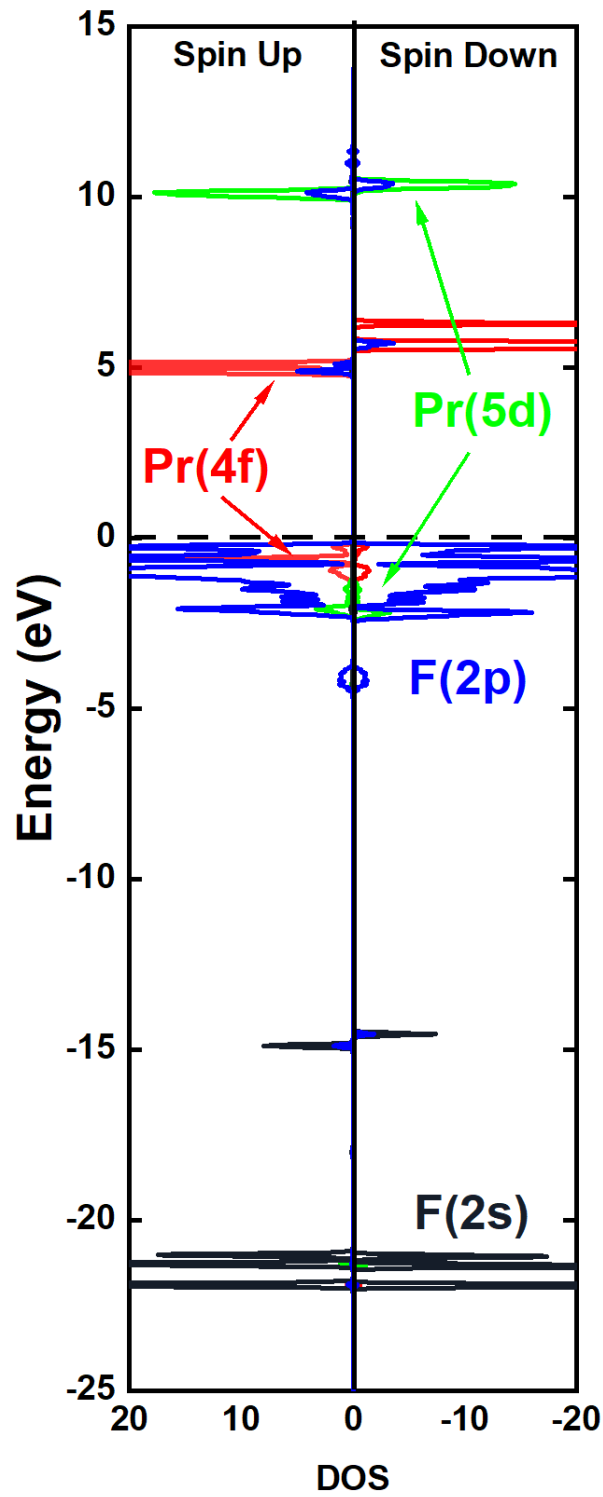

Figure S16. Partial density of states (PDOS) of  $\text{Cs}_2\text{Pr}^{\text{IV}}\text{F}_6$  crystal. The Fermi level is assigned at 0 eV.

V. The spin density analysis of  $\text{CsPr}^{\text{II}}\text{F}_3$ ,  $\text{Cs}_3\text{Pr}^{\text{III}}\text{F}_6$ ,  $\text{Cs}_2\text{Pr}^{\text{IV}}\text{F}_6$ , and  $\text{CsPr}^{\text{V}}\text{F}_6$  crystal.

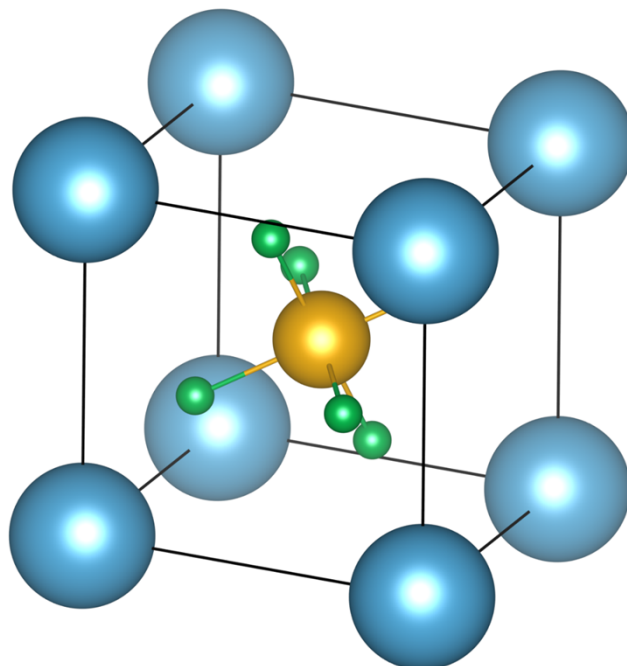

Figure S17. The spin density of primary  $\text{CsPr}^{\text{V}}\text{F}_6$  cell. The isovalue is  $0.002 \text{ e}/\text{\AA}^3$ .

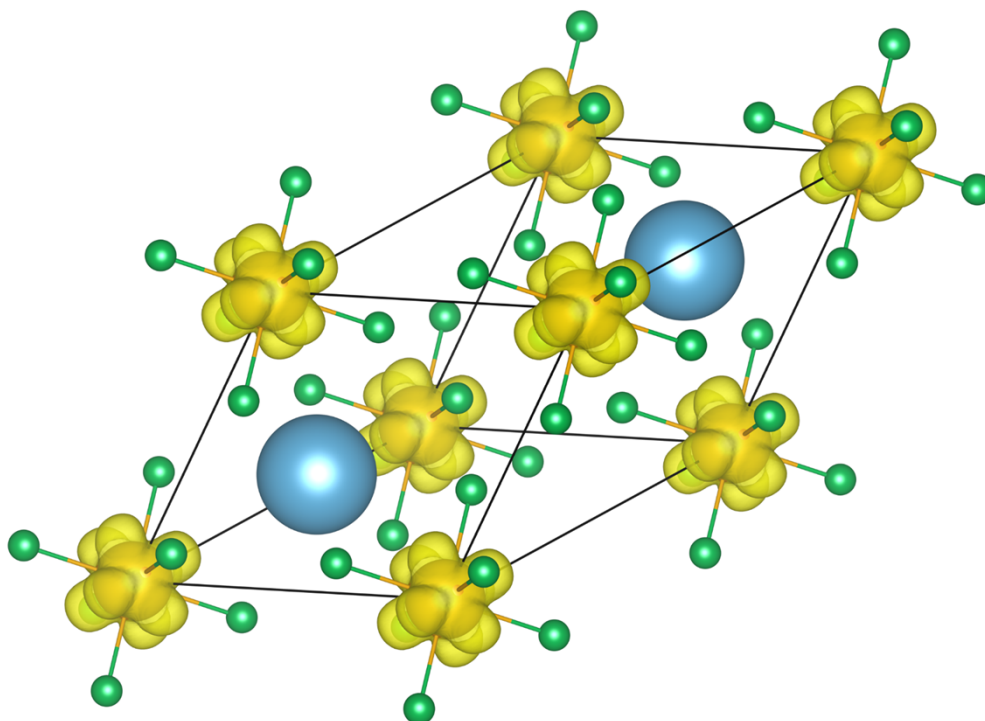

Figure S18. The spin density of primary  $\text{Cs}_2\text{Pr}^{\text{IV}}\text{F}_6$  cell. The isovalue is  $0.002 \text{ e}/\text{\AA}^3$ .

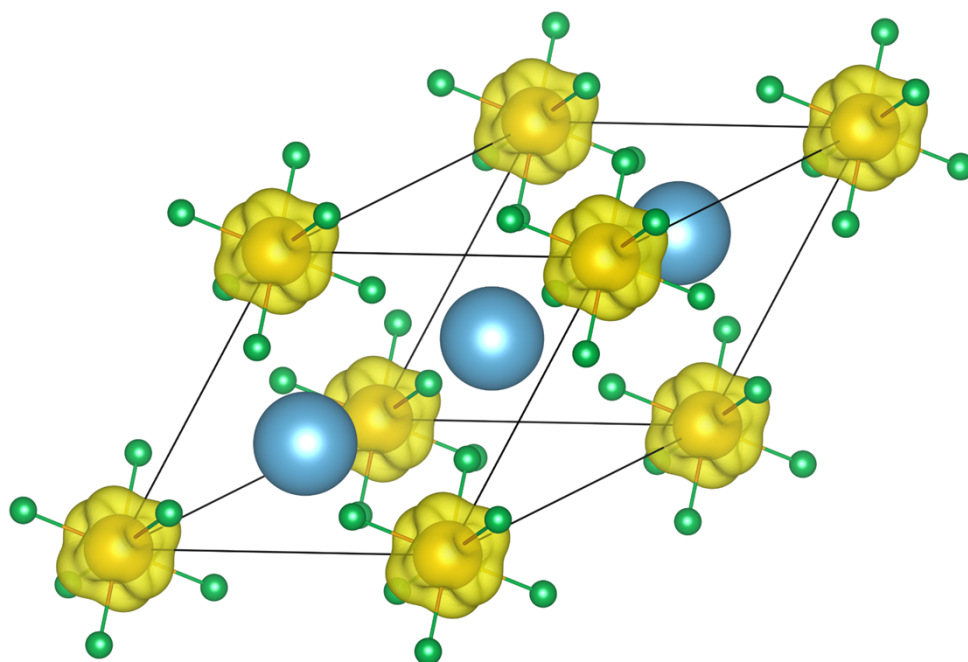

Figure S19. The spin density of primary  $\text{Cs}_3\text{Pr}^{\text{III}}\text{F}_6$  cell. The isovalue is  $0.002 \text{ e}/\text{\AA}^3$ .

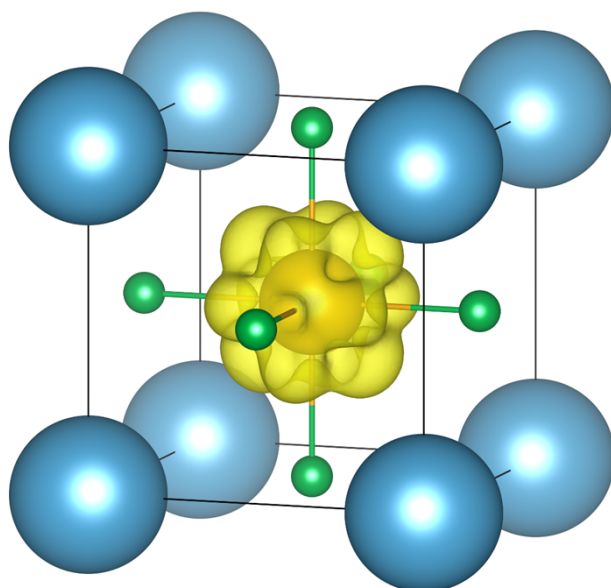

Figure S20. The spin density of primary  $\text{CsPr}^{\text{II}}\text{F}_3$  cell. The isovalue is  $0.002 \text{ e}/\text{\AA}^3$ .



## VI. The COHP analysis of $\text{CsPr}^{\text{II}}\text{F}_3$ , $\text{Cs}_3\text{Pr}^{\text{III}}\text{F}_6$ , and $\text{Cs}_2\text{Pr}^{\text{IV}}\text{F}_6$ crystal.

The COHP data of  $\text{CsPr}^{\text{II}}\text{F}_3$ ,  $\text{Cs}_3\text{Pr}^{\text{III}}\text{F}_6$ , and  $\text{Cs}_2\text{Pr}^{\text{IV}}\text{F}_6$  crystal was shown in Figure S17 - S19.

### $\text{CsPrF}_3$

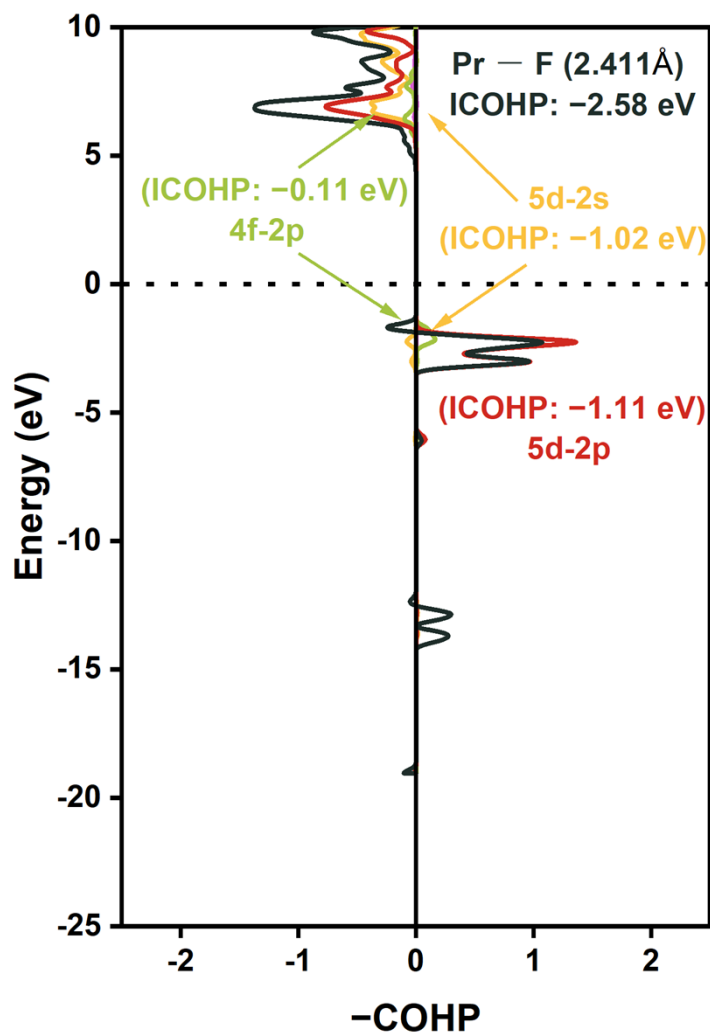

Figure S21. The crystal orbital Hamiltonian population (COHP) analysis of Pr-F interactions in solid-state  $\text{CsPr}^{\text{II}}\text{F}_3$ . Zero line (dotted) represents the Fermi level. The ICOHP values (in eV/bond) are listed here to show the corresponding interactions (black) and main orbital-pair contributions to these (colored).

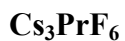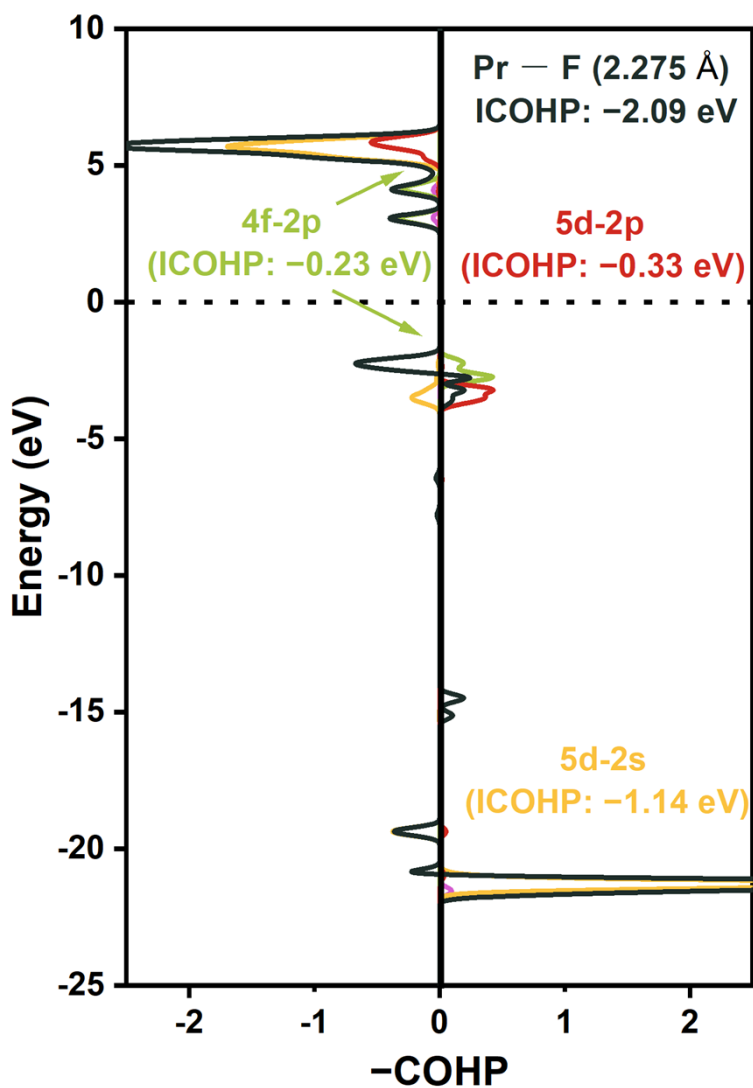

Figure S22. The crystal orbital Hamilton population (COHP) analysis of Pr–F interactions in solid-state  $\text{Cs}_3\text{Pr}^{\text{III}}\text{F}_6$ . Zero line (dotted) represents the Fermi level. The ICOHP values (in eV/bond) are listed here to show the corresponding interactions (black) and main orbital-pair contributions to these (colored).

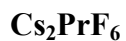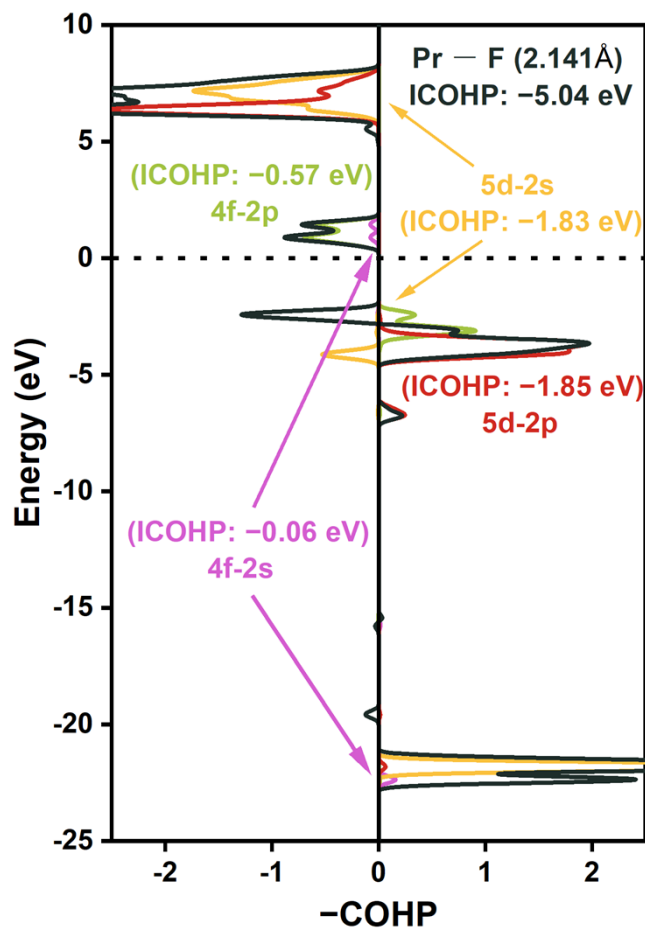

Figure S23. The crystal orbital Hamilton population (COHP) analysis of Pr-F interactions in solid-state  $\text{Cs}_2\text{Pr}^{\text{IV}}\text{F}_6$ . Zero line (dotted) represents the Fermi level. The ICOHP values (in eV/bond) are listed here to show the corresponding interactions (black) and main orbital-pair contributions to these (colored).

## VII. CsPrF<sub>6</sub> Atom Coordinate Information

| CsPrF <sub>6</sub> |                    |                    |                    |
|--------------------|--------------------|--------------------|--------------------|
| F                  | 0.5635899899999970 | 0.7093999980000021 | 0.0098699930000024 |
| F                  | 0.4364100100000030 | 0.2906000019999979 | 0.9901300069999976 |
| F                  | 0.2906000019999979 | 0.8541899920000020 | 0.0098699930000024 |
| F                  | 0.7093999980000021 | 0.1458100079999980 | 0.9901300069999976 |
| F                  | 0.1458100079999980 | 0.4364100100000030 | 0.0098699930000024 |
| F                  | 0.8541899920000020 | 0.5635899899999970 | 0.9901300069999976 |
| F                  | 0.2302566620000022 | 0.0427333299999972 | 0.3432033360000020 |
| F                  | 0.1030766740000004 | 0.6239333150000022 | 0.3234633510000009 |
| F                  | 0.9572666879999971 | 0.1875233199999968 | 0.3432033360000020 |
| F                  | 0.3760666550000025 | 0.4791433509999976 | 0.3234633510000009 |
| F                  | 0.8124766950000009 | 0.7697433230000001 | 0.3432033360000020 |
| F                  | 0.5208566780000012 | 0.8969233039999978 | 0.3234633510000009 |
| F                  | 0.8969233039999978 | 0.3760666550000025 | 0.6765366790000016 |
| F                  | 0.7697433230000001 | 0.9572666879999971 | 0.6567966940000005 |
| F                  | 0.6239333150000022 | 0.5208566780000012 | 0.6765366790000016 |
| F                  | 0.0427333299999972 | 0.8124766950000009 | 0.6567966940000005 |
| F                  | 0.4791433509999976 | 0.1030766740000004 | 0.6765366790000016 |
| F                  | 0.1875233199999968 | 0.2302566620000022 | 0.6567966940000005 |
| Cs                 | 0.6666666870000029 | 0.3333333429999996 | 0.3333333730000021 |
| Cs                 | 0.3333333129999971 | 0.6666666269999979 | 0.6666666269999979 |
| Cs                 | 0.0000000000000000 | 0.0000000000000000 | 0.0000000000000000 |
| Pr                 | 0.0000000000000000 | 0.0000000000000000 | 0.5000000000000000 |
| Pr                 | 0.6666666870000029 | 0.3333333429999996 | 0.8333333129999971 |
| Pr                 | 0.3333333429999996 | 0.6666666870000029 | 0.1666666719999981 |
